# Supplementary material for: Two novel supramolecular structures of Evans–Showell type polyoxometalate for heterogeneous and efficient catalytic conversion of different sulfides
Source: Royal Society of Chemistry journal article supplement (doi:10.1039/d3nj01441j), 2023-01-01
Supplement: d3nj01441j1.pdf [file d3nj01441j1.pdf]

## Supporting Information

### **Two novel supramolecular structures of Evans-Showell type polyoxometalate for heterogeneous and efficient catalytic conversion of different sulfides**

Haiyan An,\* Yaohui Huang, Yanhong Chen, Qingshan Zhu and Yuting Wei

School of Chemical Engineering, Dalian University of Technology, Dalian 116023, People's Republic of China.

---

\*Corresponding author. Tel: +86-411-84657675 E-mail address: anhy@dlut.edu.cn

## CONTENTS

|                                                            |    |
|------------------------------------------------------------|----|
| Section I. Supplementary Experimental Section .....        | 4  |
| 1.1 Material Preparation .....                             | 4  |
| 1.2 Characterization .....                                 | 5  |
| 1.3 X-Ray Crystallography .....                            | 5  |
| Section II. Structures and Characterization .....          | 6  |
| Section III. Supplementary Reaction Characterization ..... | 10 |
| Section IV. Crystal Data .....                             | 12 |
| Section V. Reference .....                                 | 15 |

## Section I. Supplementary Experimental Section

### 1.1 Material Preparation

$(\text{NH}_4)_6[\text{Co}_2\text{Mo}_{10}\text{H}_4\text{O}_{38}] \cdot 7\text{H}_2\text{O}$  was synthesized based on the literature method with slight modifications,<sup>1</sup> of which structure was also confirmed by FT-IR spectroscopy experiments. FT-IR(KBr pellet,  $\text{cm}^{-1}$ ): 1612(m), 1401(vs), 939(vs), 908(vs), 847(s), 735(s), 689(s), 631(s), 521(m).

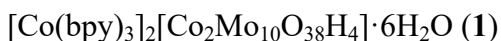

In a typical synthetic procedure,  $\text{CoCl}_2 \cdot 6\text{H}_2\text{O}$  (0.6mmol, 143mg) and polyoxometalate precursor (~0.1mmol, 200mg) were dissolved in 5 ml deionized water, respectively. They were mixed after thorough stirring and 2,2'-bipyridine (0.2mmol, 32mg) was added to the resulting solution. After stirring for 5 hours, the pH of the solution was adjusted to 3.0 using 1M  $\text{HNO}_3$  and 2M KOH. The solution was kept stirring for another hour and the pH was finely adjusted to ensure consistency with expectation. The suspension was transferred to Teflon-lined hydrothermal synthesis reactor and heated at  $85^\circ\text{C}$  for 4 days. After 48 hours of natural cooling, the resulting product was washed thoroughly in the ultrasonic cleaner sequentially with water and ethanol to obtain green crystals in flakes.

$\text{C}_{60}\text{H}_{64}\text{N}_{12}\text{Co}_4\text{Mo}_{10}\text{O}_{44}$ (2852.33), Found (Calcd)%: C, 24.98 (25.27); H, 2.19 (2.26); N, 5.27 (5.89).

FT-IR(KBr Pellet,  $\text{cm}^{-1}$ ): 1638(m), 1604(s), 1568(w), 1500(m), 1467(m), 1449(s), 1317(m), 1246(m), 1178(w), 1076(w), 1037(m), 939(vs), 912(vs), 855(vs), 769(vs), 723(s), 687(vs), 522(s).

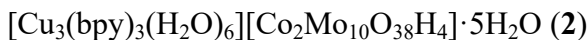

The synthesis path for the hybrid with copper as a bridging atom is similar to that of cobalt, except that  $\text{CoCl}_2 \cdot 6\text{H}_2\text{O}$  is replaced by  $\text{CuCl}_2 \cdot 2\text{H}_2\text{O}$  (0.2mmol, 34mg). The amount of polyoxometalate precursor is 0.1 mmol while the amount of ligand is twice as much. The green crystals in flakes were obtained optimized quality under  $\text{pH}=2.5$ .

$C_{30}H_{50}N_6Cu_3Co_2Mo_{10}O_{49}$  (2546.63), Found (Calcd)%: C, 14.20 (14.15); H, 1.89 (1.98); N, 3.21 (3.30).

FT-IR(KBr Pellet,  $cm^{-1}$ ): 1600(m), 1566(w), 1495(w), 1472(m), 1442(m), 1315(w), 1247(w), 1157(w), 1023(w), 947(vs), 909(vs), 859(s), 772(s), 728(s), 690(s), 523(s).

One can easily notice that the ratio of copper or cobalt hydrate in the precursors to the other raw materials is not equal when obtaining the best quality crystals in the synthesis of above-mentioned compounds. Some parallel experiments have demonstrated that copper hydrate is indeed needed in much smaller amounts to obtain high-quality crystals and excess amount leads to massive growth of cracks on the crystal surface. For compound **1**, when the amount of cobalt hydrate was reduced, the size of the crystal became so small that it was very unfavorable to collect diffraction test data.

## 1.2 Characterization

The X-ray single crystal diffraction were collected by Bruker D8 Venture single crystal diffractometer with Mo-K $\alpha$  radiation. IR spectra were recorded in the range 4000 - 400  $cm^{-1}$  on a Nexus Euro FT/IR Spectrophotometer using KBr pellets. The powder X-ray diffraction (PXRD) patterns of the as-prepared products were carried out by using Bruker D8 Advanced X-ray diffractometer with Cu-K $\alpha$  radiation ( $\lambda = 0.154$  nm) and  $2\theta$  transforming from 5 to 50°. The EDS were determined using a JSM-7610F Plus scanning electron microscope at an accelerating voltage of 10 kV. Energy-dispersive spectroscopy (EDS) mapping was employed to examine the element mapping of compounds **1** & **2**. Elemental analyses (H, C and N) were performed on a Perkin-Elmer 2400 CHN elemental analyzer; Liquid UV-vis spectrum was measured from 200 to 400 nm on Techcomp UV1000 spectrophotometer. The products in catalytic experiments were detected by gas chromatography with SE-54 capillary column (Techcomp GC 7900II) and gas chromatography-mass spectroscopy (Trace ISQ). The thermal weight loss curves of the two compounds were recorded by TA Q500 thermogravimetric analyzer.

### 1.3 X-Ray Crystallography

The crystal data of **1** and **2** were collected at 193 K or 302 K with graphite monochromatic Mo K $\alpha$  radiation ( $\lambda = 0.71073 \text{ \AA}$ ). The crystal structures were solved and refined by full matrix least-squares methods against  $F^2$  by using SHELXTL programs.<sup>2</sup> All non-hydrogen atoms were refined with anisotropic temperature parameters. All hydrogen atoms associated with C and N atoms were placed in geometrically idealized positions using a riding model. Crystallographic data, structure refinements and CCDC reference numbers for **1** and **2** are listed in Table S1.

## Section II. Structures and Characterization

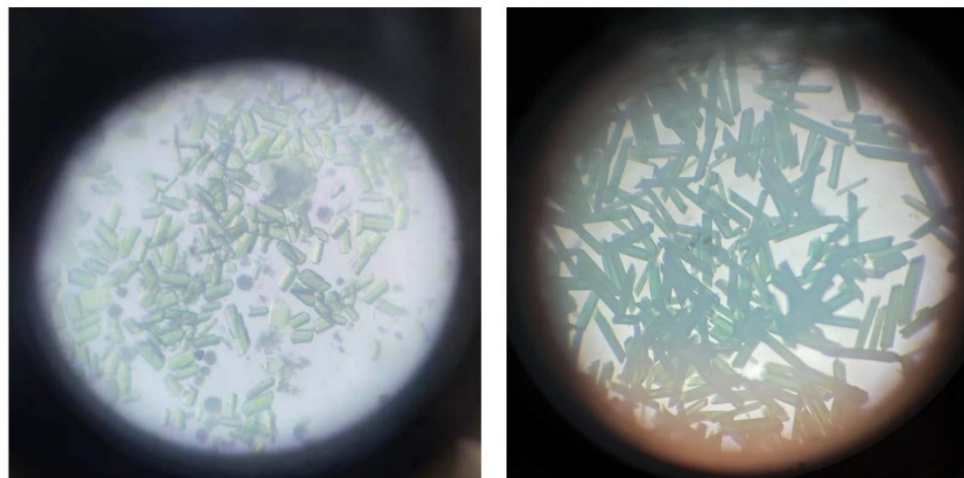

**Fig. S1** The crystal photos of compound **1** (left) and compound **2** (right) under the microscope.

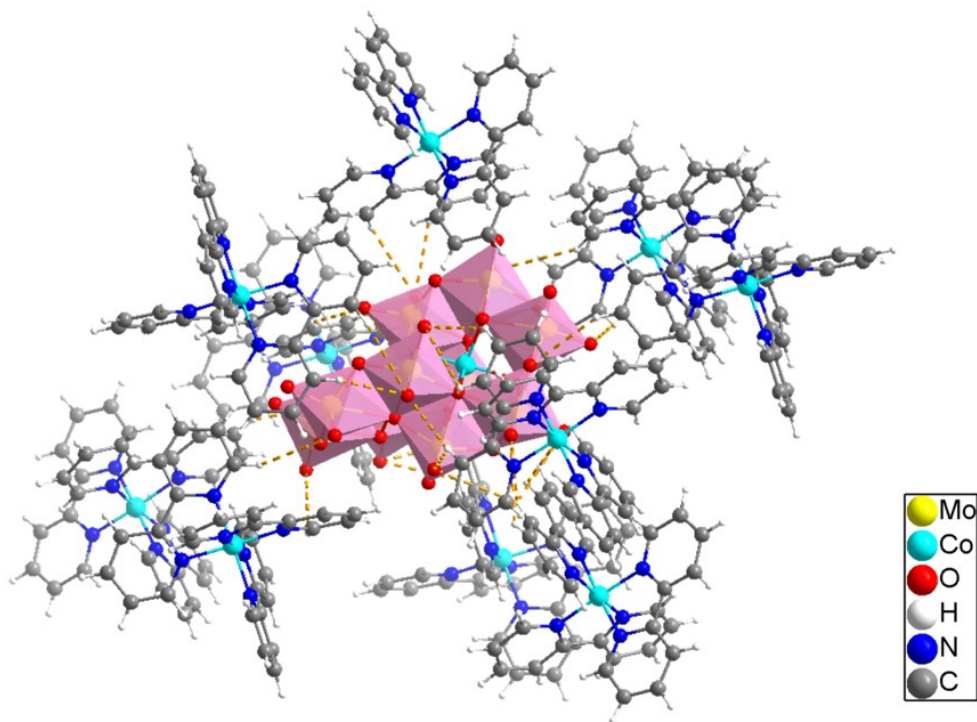

**Fig. S2** The C-H...O hydrogen bonds between  $[\text{Co}(\text{bpy})_3]^{3+}$  and  $[\text{Co}_2\text{Mo}_{10}\text{O}_{38}\text{H}_4]^{6-}$  in compound **1**.

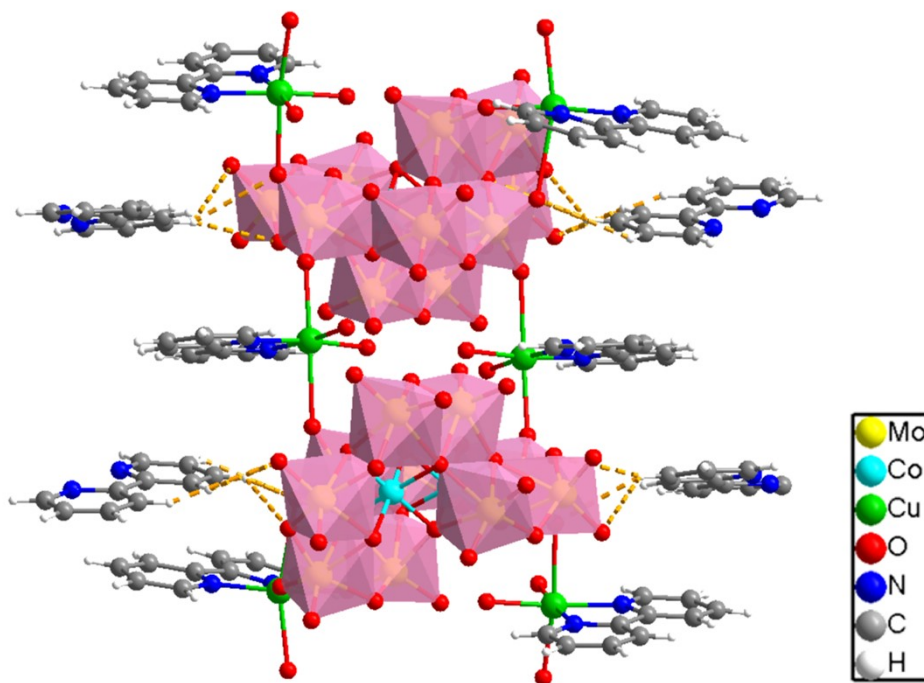

**Fig. S3** The C–H···O hydrogen bonds between [Cu(bpy)]<sup>2+</sup> and [Co<sub>2</sub>Mo<sub>10</sub>O<sub>38</sub>H<sub>4</sub>]<sup>6-</sup> in compound **2**.

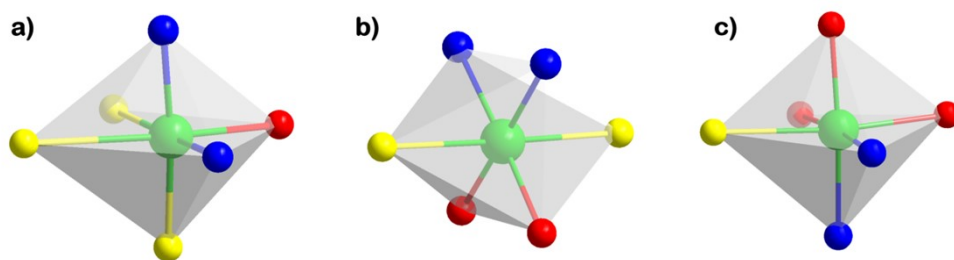

**Fig. S4** The respective coordination spheres of different Cu atoms in **2**. (a) Cu1. (b) Cu2. (c) Cu3. green: Cu atom, blue: N atom on ligand, red: O atom on water, yellow: O atom on POM skeleton.

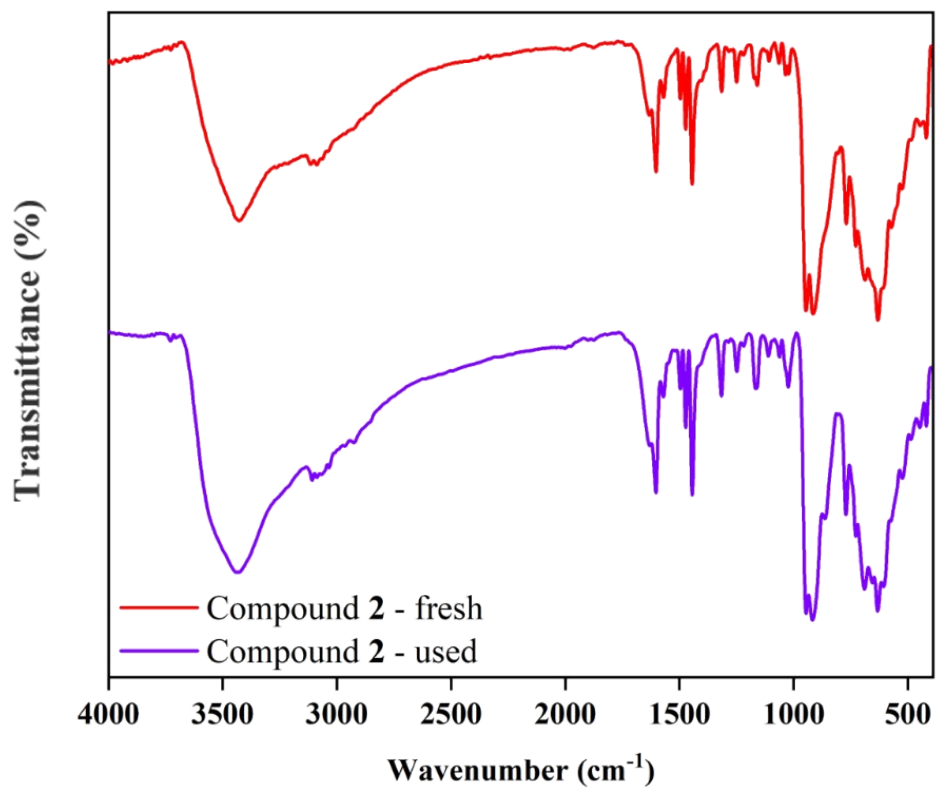

Fig. S5 FT-IR spectra of compound 2 before and after catalytic reaction.

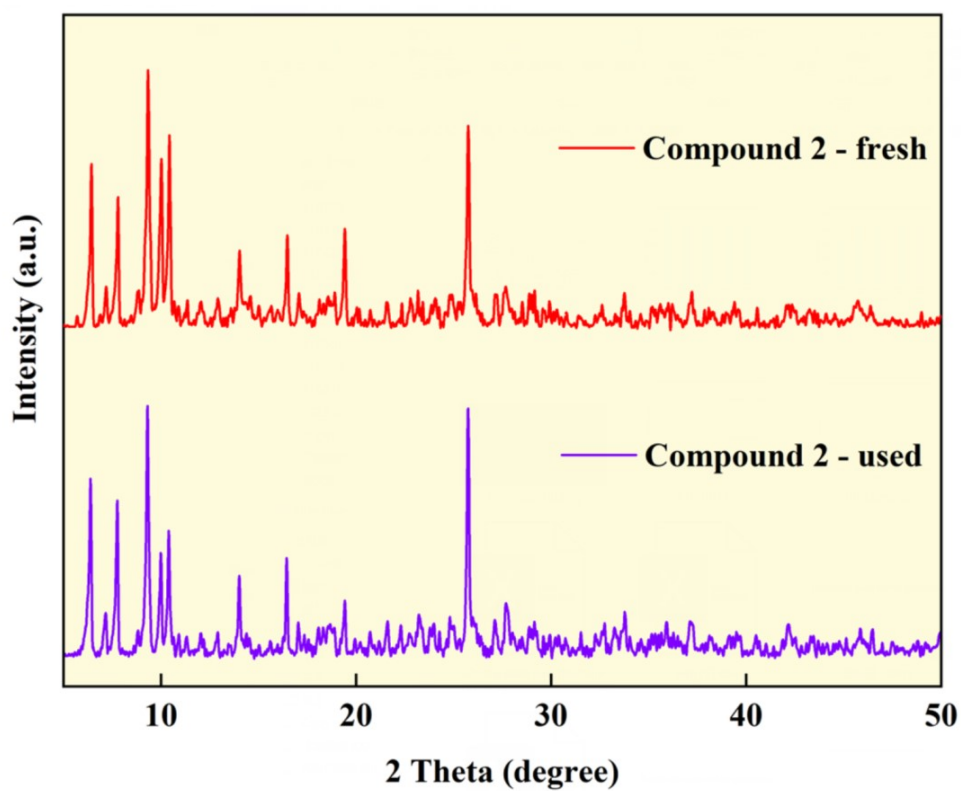

Fig. S6 Experimental PXRD patterns of compound 1 before and after catalytic reaction.



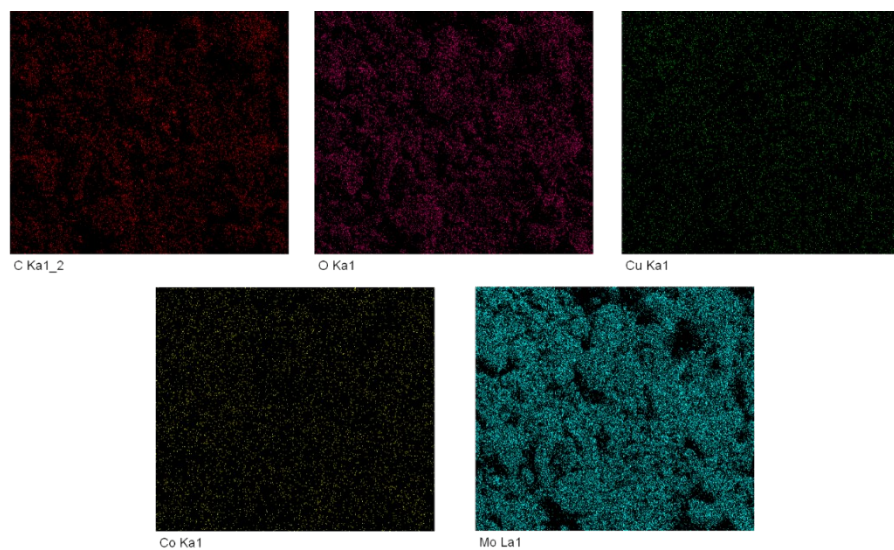

**Fig. S7** EDS elemental mapping images for C, O, Cu, Co and Mo of compound **2**.

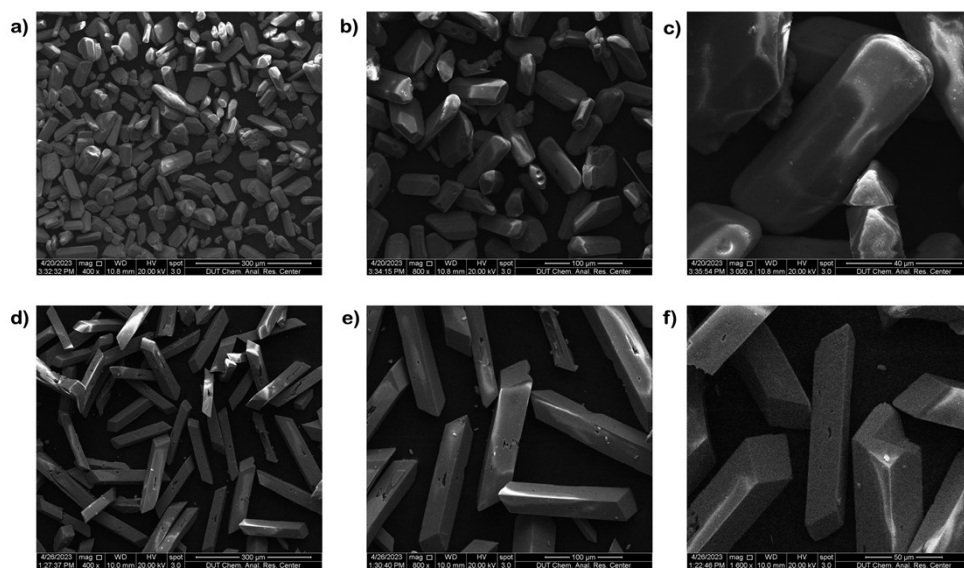

**Fig. S8** SEM images of compound **1** (a-c) and **2** (d-f).

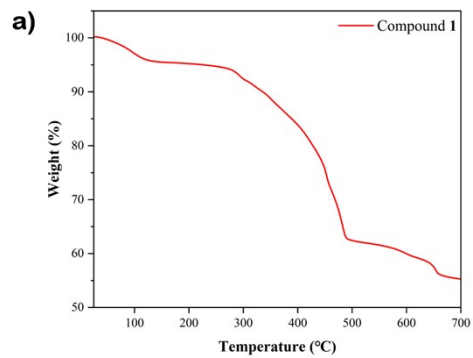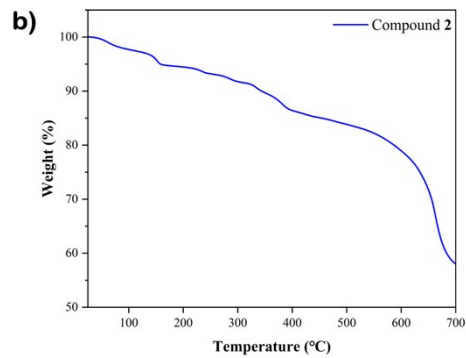

**Fig. S9** Thermogravimetric curves of compound 1 (left) and compound 2 (right).

### Section III. Supplementary Reaction Characterization

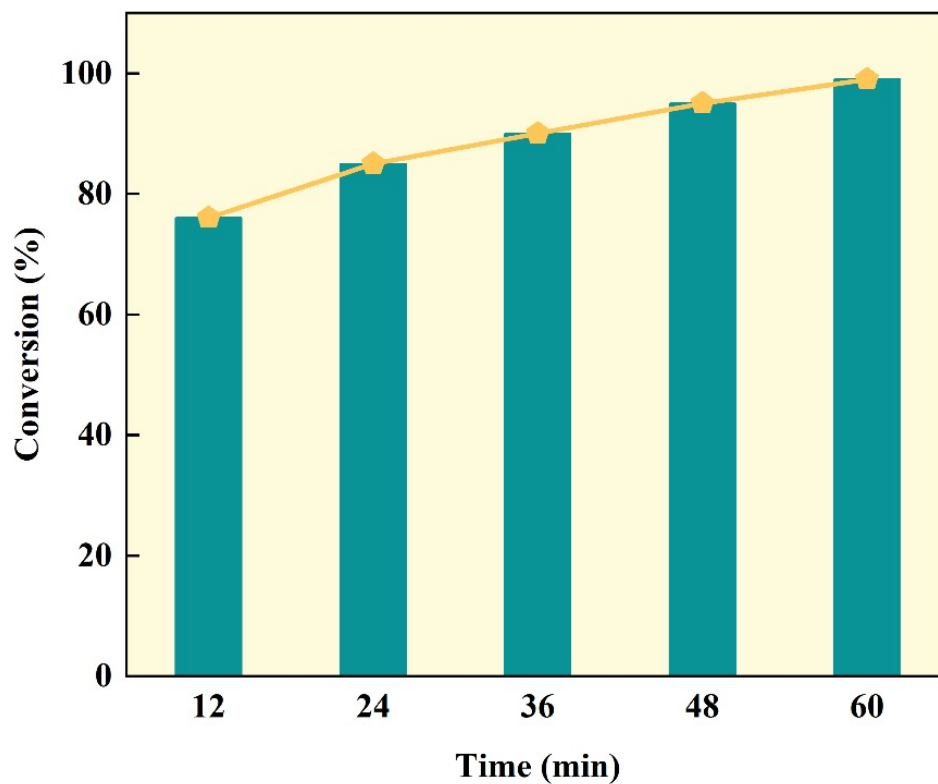

**Fig. S10** Time-sharing graph in 60 minutes of MPS oxidation using compound **2** to monitor the reaction process under optimal conditions.

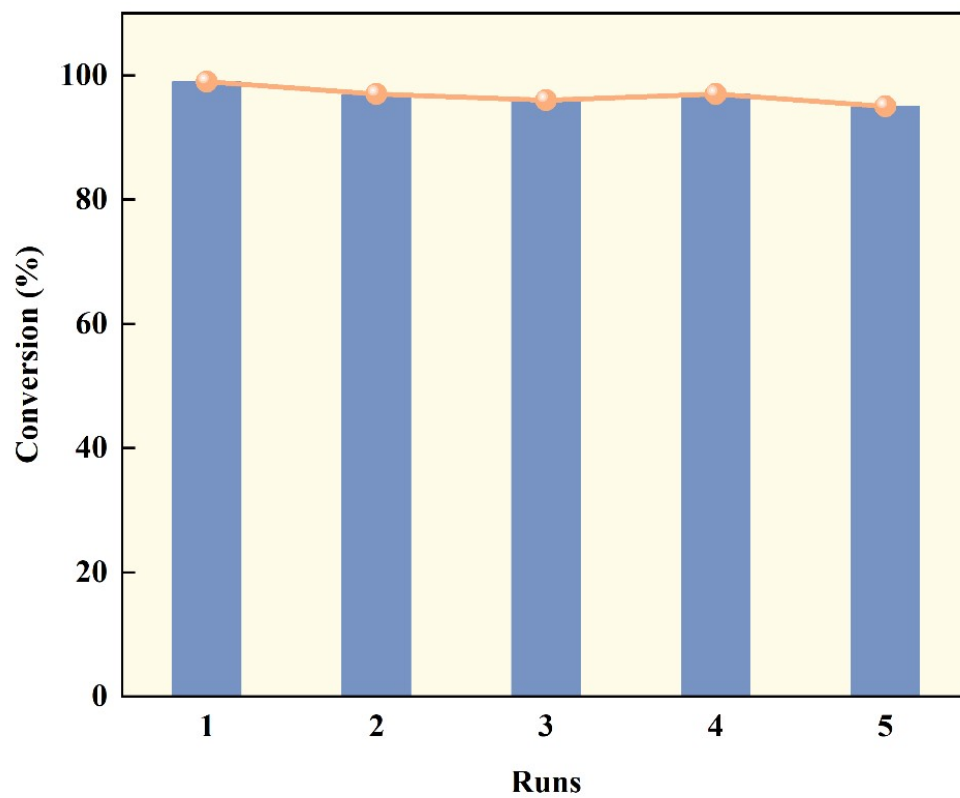

**Fig. S11** Performance stability test for compound **2** under working conditions.

## Section IV. Crystal Data

**Table S1** Crystal data and structure refinement for **1** and **2**.

| Compound                            | <b>1</b>                                                                                         | <b>2</b>                                                                                                        |
|-------------------------------------|--------------------------------------------------------------------------------------------------|-----------------------------------------------------------------------------------------------------------------|
| CCDC                                | 2250421                                                                                          | 2250422                                                                                                         |
| Empirical formula                   | C <sub>60</sub> H <sub>64</sub> N <sub>12</sub> Co <sub>4</sub> Mo <sub>10</sub> O <sub>44</sub> | C <sub>30</sub> H <sub>50</sub> N <sub>6</sub> Cu <sub>3</sub> Co <sub>2</sub> Mo <sub>10</sub> O <sub>49</sub> |
| Formula weight                      | 2852.33                                                                                          | 2546.63                                                                                                         |
| Temperature (K)                     | 193                                                                                              | 302                                                                                                             |
| Wavelength (Å)                      | 0.71073                                                                                          | 0.71073                                                                                                         |
| Crystal system                      | monoclinic                                                                                       | Monoclinic                                                                                                      |
| Space group                         | C2/c                                                                                             | P2 <sub>1</sub> /n                                                                                              |
| a (Å)                               | 12.7136(5)                                                                                       | 16.0443(6)                                                                                                      |
| b (Å)                               | 32.3882(11)                                                                                      | 20.4432(10)                                                                                                     |
| c (Å)                               | 20.7077(8)                                                                                       | 20.5811(9)                                                                                                      |
| α (°)                               | 90                                                                                               | 90                                                                                                              |
| β (°)                               | 106.411(2)                                                                                       | 106.9253(13)                                                                                                    |
| γ (°)                               | 90                                                                                               | 90                                                                                                              |
| Volume (Å <sup>3</sup> )            | 8179.4(5)                                                                                        | 6458.1(5)                                                                                                       |
| Z                                   | 4                                                                                                | 4                                                                                                               |
| Density (g/cm <sup>3</sup> )        | 2.313                                                                                            | 2.619                                                                                                           |
| F(000)                              | 5536                                                                                             | 4900                                                                                                            |
| Theta range for data collection (°) | 4.812 to 54.978                                                                                  | 2.245 to 24.999                                                                                                 |
| Index ranges                        | -16 ≤ h ≤ 16, -41 ≤ h ≤ 42,<br>-26 ≤ h ≤ 26                                                      | -18 ≤ h ≤ 19, -24 ≤ k ≤ 24,<br>-24 ≤ l ≤ 20                                                                     |
| Reflections collected               | 114209                                                                                           | 42083                                                                                                           |
| Independent reflections             | 9380 [Rint = 0.0955]                                                                             | 11347 [Rint = 0.0469]                                                                                           |
| Completeness                        | 0.997                                                                                            | 0.998                                                                                                           |
| Refinement method                   | Full-matrix least-squares on F <sup>2</sup>                                                      | Full-matrix least-squares on F <sup>2</sup>                                                                     |
| Data / restraints / parameters      | 9380/18/607                                                                                      | 11347/12/891                                                                                                    |
| Goodness-of-fit on F <sup>2</sup>   | 1.087                                                                                            | 1.015                                                                                                           |
| Final R indices [I > 2σ(I)]         | R1 = 0.0281, wR2 = 0.0627                                                                        | R1 = 0.0360, wR2 = 0.0768                                                                                       |
| R indices (all data)                | R1 = 0.0401, wR2 = 0.0730                                                                        | R1 = 0.0592, wR2 = 0.0866                                                                                       |
| Largest diff. peak and hole         | 1.03/-0.55                                                                                       | 1.367/-0.795                                                                                                    |

**Table S2** Hydrogen-bond geometry (Å, deg.) for **1**.

| D-H...A                                            | d(D-H) | d(H...A) | d(D...A)  | <(DHA) |
|----------------------------------------------------|--------|----------|-----------|--------|
| C(11)-H(11)...O(4)#3                               | 0.95   | 2.51     | 3.275(4)  | 137.7  |
| C(11)-H(11)...N(1)                                 | 0.95   | 2.51     | 3.031(5)  | 114.3  |
| C(30)-H(30)...O(8)#4                               | 0.95   | 2.6      | 3.164(4)  | 118.6  |
| C(30)-H(30)...N(2)                                 | 0.95   | 2.51     | 3.022(5)  | 113.6  |
| C(21)-H(21)...N(3)                                 | 0.95   | 2.48     | 2.985(5)  | 113.3  |
| C(27)-H(27)...O(9)#5                               | 0.95   | 2.27     | 3.204(5)  | 169    |
| C(12)-H(12)...O(1)#3                               | 0.95   | 2.4      | 3.144(5)  | 135.2  |
| C(1)-H(1)...N(5)                                   | 0.95   | 2.49     | 2.998(5)  | 113.2  |
| C(1)-H(1)...O(25 <sup>b</sup> )#5                  | 0.95   | 2.63     | 3.275(15) | 125.7  |
| C(7)-H(7)...O(18)#6                                | 0.95   | 2.29     | 3.227(5)  | 167.6  |
| C(20)-H(20)...N(6)                                 | 0.95   | 2.48     | 2.992(5)  | 113.8  |
| C(20)-H(20)...O(23)#5                              | 0.95   | 2.47     | 3.195(5)  | 133.5  |
| C(2)-H(2)...O(10)#7                                | 0.95   | 2.65     | 3.471(5)  | 145.4  |
| C(9)-H(9)...O(19)#1                                | 0.95   | 2.28     | 3.202(5)  | 164.1  |
| C(10)-H(10)...O(21)                                | 0.95   | 2.48     | 3.292(4)  | 143.2  |
| C(10)-H(10)...N(4)                                 | 0.95   | 2.49     | 3.001(5)  | 113.7  |
| C(29)-H(29)...O(7)#4                               | 0.95   | 2.44     | 3.226(5)  | 139.5  |
| C(24)-H(24)...O(9)#5                               | 0.95   | 2.09     | 3.037(4)  | 178.6  |
| O(24 <sup>a</sup> )-H(24B <sup>a</sup> )...O(22)#8 | 0.87   | 2.01     | 2.695(14) | 135    |

Symmetry transformations used to generate equivalent atoms:

#1 -x+1,y,-z+1/2, #2 -x,y,-z+1/2, #3 -x+2,-y+1,-z+1, #4 -x+1,-y+1,-z+1, #5 +1/2,y+1/2,z,  
#6 x,-y+1,z+1/2, #7 x+1,-y+1,z+1/2, #8 x+1/2,-y+1/2,z+1/2

**Table S3** Hydrogen-bond geometry (Å, deg.) for compound **2**.

| D-H...A                | d(D-H) | d(H...A) | d(D...A)  | <(DHA) |
|------------------------|--------|----------|-----------|--------|
| C(1)-H(1A)...OW5       | 0.93   | 2.13     | 2.64(3)   | 113.3  |
| C(2)-H(2A)...O(5W)     | 0.93   | 2.49     | 3.013(11) | 115.5  |
| C(6)-H(6A)...O(6W)     | 0.93   | 2.5      | 3.035(9)  | 116.8  |
| C(6)-H(6A)...O(13)     | 0.93   | 2.49     | 3.318(10) | 147.8  |
| C(9)-H(9A)...O(4W)     | 0.93   | 2.61     | 3.119(11) | 114.7  |
| C(9)-H(9A)...O(9)      | 0.93   | 2.39     | 3.238(9)  | 152.4  |
| C(11)-H(11A)...O(2)#1  | 0.93   | 2.46     | 3.310(10) | 152.8  |
| C(11)-H(11A)...O(2W)   | 0.93   | 2.54     | 3.055(10) | 115.5  |
| C(12)-H(12A)...O(11)   | 0.93   | 2.51     | 3.003(8)  | 113.2  |
| C(16)-H(16A)...OW4#2   | 0.93   | 2.57     | 3.489(14) | 170.3  |
| C(18)-H(18A)...O(4)#2  | 0.93   | 2.47     | 3.112(12) | 126.1  |
| C(26)-H(26A)...O(3W)#3 | 0.93   | 2.57     | 3.251(9)  | 130.7  |
| C(27)-H(27A)...O(24)#4 | 0.93   | 2.56     | 3.152(9)  | 121.5  |
| C(29)-H(29A)...O(32)   | 0.93   | 2.55     | 3.038(9)  | 112.8  |

Symmetry transformations used to generate equivalent atoms:

#1  $-x-1/2, y-1/2, -z+3/2$ , #2  $x-1/2, -y+3/2, z+1/2$ , #3  $x+1, y, z$ , #4  $x-1, y, z$

## Section V. Reference

- 1 G. A. Tsigdinos, PhD thesis, Boston University, 1961.
- 2 G. M. Sheldrick, SHELXS97 and SHELXL97. Program for Crystal Structure Solution and Refinement, University of Göttingen, Göttingen, Germany, 1997
